# Supplementary material for: Seasonal Variation of Antiretroviral Drug Exposure during the Year: The Experience of 10 Years of Therapeutic Drug Monitoring
Source: MDPI journal article supplement (doi:10.3390/biomedicines9091202), 2021-09-12
Supplement: s1 [file s1]

| <b>[%]</b>                | <b>Nevir<br/>apine</b> | <b>Ataza<br/>navir</b> | <b>Lopi<br/>navir</b> | <b>Abac<br/>avir</b> | <b>Teno<br/>fovir</b> | <b>Mara<br/>viroc</b> | <b>Ralte<br/>gravir</b> | <b>Emtrici<br/>tabine</b> | <b>Etrav<br/>irine</b> | <b>Rito<br/>navir</b> | <b>Efavi<br/>renz</b> | <b>Daru<br/>navir</b> |
|---------------------------|------------------------|------------------------|-----------------------|----------------------|-----------------------|-----------------------|-------------------------|---------------------------|------------------------|-----------------------|-----------------------|-----------------------|
| <b>Nevira<br/>pine</b>    | /                      | -                      | 0,04                  | 0,5                  | 1,3                   | 0,1                   | 1,6                     | 1,3                       | -                      | 0,1                   | -                     | -                     |
| <b>Atazan<br/>avir</b>    | -                      | /                      | -                     | 1,2                  | 12                    | 1                     | 2,4                     | 11,6                      | 0,04                   | 9,6                   | -                     | -                     |
| <b>Lopina<br/>vir</b>     | 0,04                   | -                      | /                     | 0,2                  | 2,6                   | 0,3                   | 0,9                     | 2,4                       | 0,4                    | 4,1                   | -                     | -                     |
| <b>Abacav<br/>ir</b>      | 0,5                    | 1,2                    | 0,2                   | /                    | -                     | 0,3                   | 0,5                     | -                         | -                      | 1,1                   | 0,1                   | 0,3                   |
| <b>Tenofo<br/>vir</b>     | 1,3                    | 12                     | 2,6                   | -                    | /                     | 2,5                   | 4,6                     | 36,8                      | 0,7                    | 14,2                  | 7,4                   | 4,2                   |
| <b>Maravi<br/>roc</b>     | 0,1                    | 1                      | 0,3                   | 0,3                  | 2,5                   | /                     | 1,8                     | 2                         | 0,4                    | 4,6                   | -                     | 4                     |
| <b>Raltegr<br/>avir</b>   | 1,6                    | 2,4                    | 0,9                   | 0,5                  | 4,6                   | 1,8                   | /                       | 4,1                       | 1,3                    | 4,6                   | 0,04                  | 2,7                   |
| <b>Emtrici<br/>tabine</b> | 1,3                    | 11,6                   | 2,4                   | -                    | 36,8                  | 2                     | 4,1                     | /                         | 0,6                    | 13,4                  | 7,4                   | 3,7                   |
| <b>Etraviri<br/>ne</b>    | -                      | 0,04                   | 0,4                   | -                    | 0,7                   | 0,4                   | 1,3                     | 0,6                       | /                      | 1,3                   | -                     | 0,8                   |
| <b>Ritona<br/>vir</b>     | 0,1                    | 9,6                    | 4,1                   | 1,1                  | 14,2                  | 4,6                   | 4,6                     | 13,4                      | 1,3                    | /                     | 0,02                  | 8,5                   |
| <b>Efavire<br/>nz</b>     | -                      | -                      | -                     | 0,1                  | 7,4                   | -                     | 0,04                    | 7,4                       | -                      | 0,02                  | /                     | 0,02                  |
| <b>Daruna<br/>vir</b>     | -                      | -                      | -                     | 0,3                  | 4,2                   | 4                     | 2,7                     | 3,7                       | 0,8                    | 8,5                   | 0,02                  | /                     |

**Supplementary Table S1** :Combination Percentage of antiretroviral treatment
